# Supplementary material for: p38 MAP Kinase Inhibition Reduces Propionibacterium acnes-Induced Inflammation in Vitro
Source: PubMed Central journal article supplement — Dermatol Ther (Heidelb). 2015 Mar 7;5(1):53–66. doi: 10.1007/s13555-015-0072-7 (PMC4374066; doi:10.1007/s13555-015-0072-7), 2015-03-07
Supplement: 13555_2015_72_MOESM1_ESM.pdf [file 13555_2015_72_MOESM1_ESM.pdf]

- Inflammatory responses mediated by *Propionibacterium acnes*-induced activation of p38 mitogen-activated protein kinase (p38 MAPK or p38) in keratinocytes was investigated.
- In human acne inflammatory lesions, an increased level of phospho-p38 was observed.
- Viable *P. acnes* induced rapid and transient activation of p38 and extracellular signal-related kinase (ERK1/2) and relatively slow but sustained activation of c-Jun N-terminal kinases (JNK1/2) in human keratinocytes.
- Viable *P. acnes* induced the secretion of interleukin-1 $\alpha$  (IL-1 $\alpha$ ), tumor necrosis factor- $\alpha$  (TNF- $\alpha$ ), and IL-8 from human keratinocytes.
- SB203580 (a p38 $\alpha$ / $\beta$  inhibitor) and SCIO-469 (a selective inhibitor of p38 $\alpha$ ) could inhibit phosphorylation of p38 (phospho-p38) and the secretion of cytokines induced by *P. acnes* in cultured keratinocytes.

This summary slide represents the opinions of the authors. Sponsorship for this study was funded by Johnson & Johnson. For a full list of acknowledgments and conflicts of interest for all authors of this article, please see the full text online. Copyright © The Author(s) 2015. Creative Commons Attribution Noncommercial License (CC BY-NC).
